# Supplementary material for: Factors associated with perceived coercion in adults receiving psychiatric care: a scoping review protocol
Source: PubMed Central journal article supplement — BMJ Open. 2022 Oct 17;12(10):e065393. doi: 10.1136/bmjopen-2022-065393 (PMC9577918; doi:10.1136/bmjopen-2022-065393), 2022-10-17
Supplement: bmjopen-2022-065393supp002.pdf [file bmjopen-2022-065393supp002.pdf]

## **Stratégies de recherche**

### **Perception de la coercition en psychiatrie**

#### **PUBMED (recherche faite le 18 août 2021)**

("Coercion"[Mesh] OR "Involuntary Treatment, Psychiatric"[Mesh] OR "Commitment of Mentally Ill"[Mesh] OR "Restraint, Physical"[Mesh:NoExp] OR Coercion[TIAB] OR Coercing[TIAB] OR Coercive[TIAB] OR Coerced[TIAB] OR Involuntary[TIAB] OR Involuntarily[TIAB] OR Commitment[TIAB] OR commitments[TIAB] OR Restraint[TIAB] OR restrained[TIAB] OR Restraining[TIAB] OR Seclusion[TIAB] OR secluded[TIAB] OR Secluding[TIAB] OR Constraint[TIAB] OR constrained[TIAB] OR Constraining[TIAB] OR forced[TIAB] OR force[TIAB] OR compulsory[TIAB] OR intimidation[TIAB] OR intimidate[TIAB] OR intimidated[TIAB]) **AND** ("Perception"[Mesh:NoExp] OR "Social Perception"[Mesh:NoExp] OR Perception[TIAB] OR perceptions[TIAB] OR Perceived[TIAB] OR Perceive[TIAB] OR Perceiving[TIAB] OR Experience[TIAB] OR experiences[TIAB] OR Experienced[TIAB] OR Experiencing[TIAB] OR Subjective[TIAB])) **AND** ("Mental Disorders"[Mesh:NoExp] OR "Bipolar and Related Disorders"[Mesh] OR "Schizophrenia Spectrum and Other Psychotic Disorders"[Mesh] OR "Mentally Ill Persons"[Mesh] OR "Hospitals, Psychiatric"[Mesh] OR "Psychiatric Department, Hospital"[Mesh] OR Psychiatric[TIAB] OR Psychiatry[TIAB] OR "Mental health"[TIAB] OR "Mental illness"[TIAB] OR "mental illnesses"[TIAB] OR "Mentally ill"[TIAB] OR "Mental disorder"[TIAB] OR "mental disorders"[TIAB] OR "Mentally disordered"[TIAB] OR Schizophrenia[TIAB] OR Schizophrenic[TIAB] OR Psychosis[TIAB] OR Psychotic[TIAB] OR bipolar[TIAB])

Filters : English, French

**Nombre de résultats : 4223**

---

#### **MEDLINE (recherche faite le 18 août 2021)**

1. Coercion/,
2. Involuntary Treatment, Psychiatric/,
3. "Commitment of Mentally Ill"/,
4. Restraint, Physical/,
5. (Coerc\* or Involunt\* or Commitment\* or Restrain\* or Seclusion or Seclud\* or Constraint or Constrain\* or forced or force or compulsory or intimidat\*).ti. or (Coerc\* or Involunt\* or Commitment\* or Restrain\* or Seclusion or Seclud\* or Constraint or Constrain\* or forced or force or compulsory or intimidat\*).ab.
6. 1 or 2 or 3 or 4 or 5,
7. Perception/ or Social perception/,

8. (Perception\* or Perceiv\* or Experienc\* or Subjective).ti. OR (Perception\* or Perceiv\* or Experienc\* or Subjective).ab.
9. 7 or 8,
10. Mental Disorders/,
11. exp "Bipolar and Related Disorders"/,
12. exp "schizophrenia spectrum and other psychotic disorders"/,
13. Mentally Ill Persons/,
14. Hospitals, Psychiatric/,
15. Psychiatric Department, Hospital/,
16. (Psychiatric or Psychiatry or "Mental health" or "Mental\* ill\*" or "Mental\* disorder\*" or Schizophren\* or Psychosis or Psychotic or bipolar).ti OR (Psychiatric or Psychiatry or "Mental health" or "Mental\* ill\*" or "Mental\* disorder\*" or Schizophren\* or Psychosis or Psychotic or bipolar).ab
17. 10 or 11 or 12 or 13 or 14 or 15 or 16,
18. 6 and 9 and 17,
19. limit 18 to (english or french),

**Nombre de résultats : 4583**

---

#### **EMBASE (Recherche faite le 18 août 2021)**

1. involuntary commitment/,
2. physical restraint/,
3. (Coerc\* or Involunt\* or Commitment\* or Restrain\* or Seclusion or Seclud\* or Constraint or Constrain\* or forced or force or compulsory or intimidat\*).ti. or (Coerc\* or Involunt\* or Commitment\* or Restrain\* or Seclusion or Seclud\* or Constraint or Constrain\* or forced or force or compulsory or intimidat\*).ab.,
4. 1 or 2 or 3,
5. perception/,
6. (Perception\* or Perceiv\* or Experienc\* or Subjective).ti. or (Perception\* or Perceiv\* or Experienc\* or Subjective).ab.,
7. 5 or 6,
8. mental disease/,

9. exp bipolar disorder/,
10. exp schizophrenia spectrum disorder/,
11. exp psychosis/,
12. mental patient/,
13. exp mental hospital/,
14. psychiatric department/,
15. (Psychiatric or Psychiatry or "Mental health" or "Mental\* ill\*" or "Mental\* disorder\*" or Schizophren\* or Psychosis or Psychotic or bipolar).ti. or (Psychiatric or Psychiatry or "Mental health" or "Mental\* ill\*" or "Mental\* disorder\*" or Schizophren\* or Psychosis or Psychotic or bipolar).ab.,
16. 8 or 9 or 10 or 11 or 12 or 13 or 14 or 15,
17. 4 and 7 and 16,
18. limit 17 to (english or french),

**Nombre de résultats : 6108**

---

**PsycINFO (recherche faite le 18 août 2021)**

1. coercion/,
2. involuntary treatment/,
3. "commitment (psychiatric)" /,
4. physical restraint/,
5. patient seclusion/,
6. (Coerc\* or Involunt\* or Commitment\* or Restrain\* or Seclusion or Seclud\* or Constraint or Constrain\* or forced or force or compulsory or intimidat\*).ti. or (Coerc\* or Involunt\* or Commitment\* or Restrain\* or Seclusion or Seclud\* or Constraint or Constrain\* or forced or force or compulsory or intimidat\*).ab.,
7. 1 or 2 or 3 or 4 or 5 or 6,
8. Perception/ or Social perception/,
9. (Perception\* or Perceiv\* or Experienc\* or Subjective).ti. or (Perception\* or Perceiv\* or Experienc\* or Subjective).ab.,
10. 8 or 9,
11. mental disorders/,

12. exp bipolar disorder/,
13. exp psychosis/,
14. psychiatric patients/,
15. psychiatric hospitals/,
16. psychiatric units/,
17. (Psychiatric or Psychiatry or "Mental health" or "Mental\* ill\*" or "Mental\* disorder\*" or Schizophren\* or Psychosis or Psychotic or bipolar).ti. or (Psychiatric or Psychiatry or "Mental health" or "Mental\* ill\*" or "Mental\* disorder\*" or Schizophren\* or Psychosis or Psychotic or bipolar).ab.,
18. 11 or 12 or 13 or 14 or 15 or 16 or 17,
19. 7 and 10 and 18,
20. limit 19 to (english or french),

**Nombre de résultats : 5376**

---

#### **CINAHL (recherche faite le 18 août 2021)**

S10, S5 AND S6 AND S9, Limiters - Language: English, French

S9, S7 OR S8,

S8, TI(Psychiatric OR Psychiatry OR "Mental health" OR "Mental\* ill\*" OR "Mental\* disorder\*" OR Schizophren\* OR Psychosis OR Psychotic OR bipolar) OR AB(Psychiatric OR Psychiatry OR "Mental health" OR "Mental\* ill\*" OR "Mental\* disorder\*" OR Schizophren\* OR Psychosis OR Psychotic OR bipolar),

S7, (MH "Mental Disorders") OR (MH "Mental Disorders, Chronic") OR (MH "Psychotic Disorders+") OR (MH "Bipolar Disorder+") OR (MH "Hospitals, Psychiatric") OR (MH "Psychiatric Units") OR (MH "Psychiatric Patients+"),

S6, S3 OR S4,

S5, S1 OR S2,

S4, TI(Perception\* OR Perceiv\* OR Experienc\* OR Subjective) OR AB(Perception\* OR Perceiv\* OR Experienc\* OR Subjective),

S3, (MH "Perception") OR (MH "Perceptual Distortion"),

S2, TI(Coerc\* or Involunt\* or Commitment\* or Restrain\* or Seclusion or Seclud\* or Constraint or Constrain\* or forced or force or compulsory or intimidat\* ) OR AB(Coerc\* or Involunt\* or Commitment\* or Restrain\* or Seclusion or Seclud\* or Constraint or Constrain\* or forced or force or compulsory or intimidat\*),

S1, (MH "Coercion") OR (MH "Involuntary Commitment") OR (MH "Involuntary Treatment") OR (MH "Restraint, Physical") OR (MH "Patient Seclusion"),

**Nombre de résultats : 2997**

---

**Nombre total de résultats : 23 287**

**Nombre de doublons (voir grille pour les détails) : 12 575**

**GRAND TOTAL : 10 712**
